# Supplementary material for: Autophagy in Rat Müller Glial Cells Is Modulated by the Sirtuin 4/AMPK/mTOR Pathway and Induces Apoptosis under Oxidative Stress
Source: MDPI journal article supplement (doi:10.3390/cells11172645), 2022-08-25
Supplement: s1 [file s1]

## **Supplementary Information for**

Autophagy in rat Müller glia cell is modulated by Sirtuin4/AMPK/mTOR pathway and induce apoptosis under oxidative stress

Meng-Qi Qin†, Zhi Xie†, Ting Cao, Zhi-Ruo Wang, Xiao-Yu Zhang, Fei-Fei Wang, Wei Wei, Ming Jin, Jing-Yuan Ma, Zeng Lin, Ya-Nan Wang, Shao-Nan Pei and Xu Zhang\*

Correspondence: Xu Zhang

E-mail: [xuzhang19@163.com](mailto:xuzhang19@163.com)

This PDF file includes:

FIGURE S1-S15

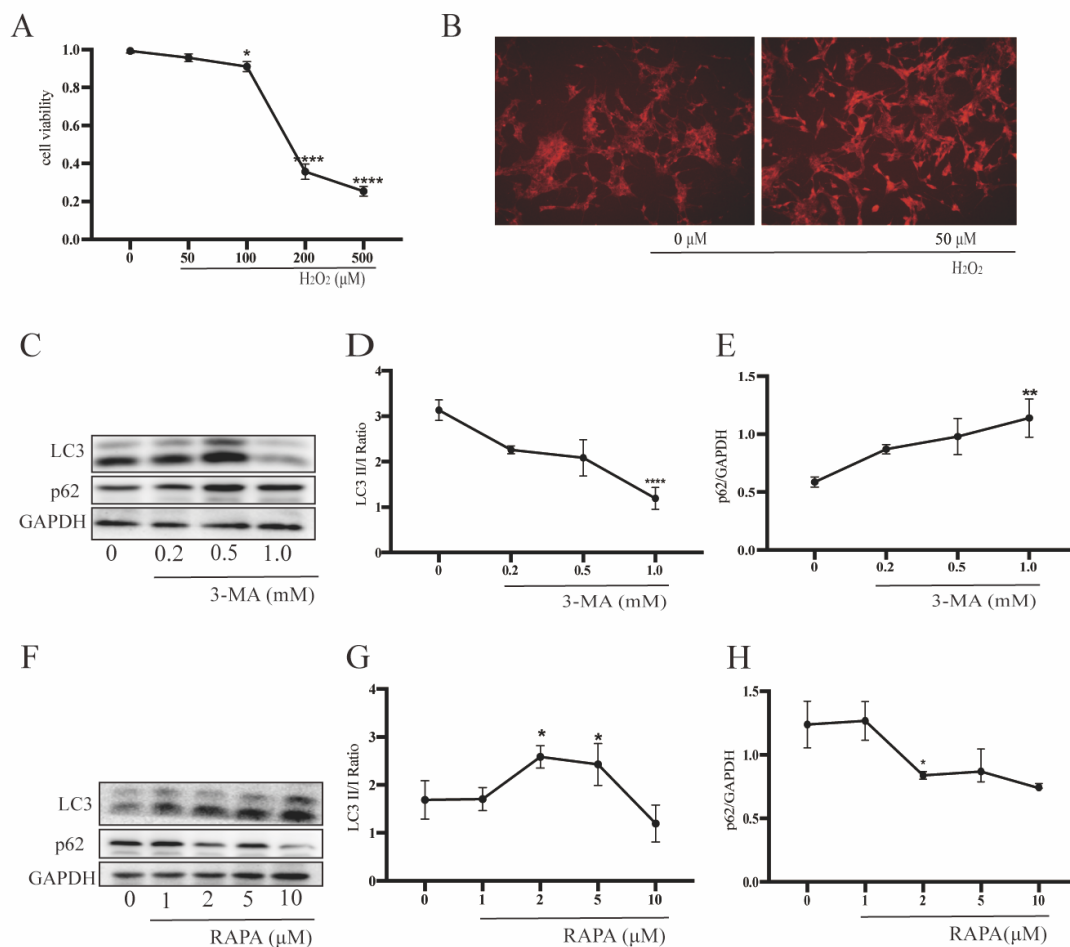

**FIGURE S1:** The subtoxic level of H<sub>2</sub>O<sub>2</sub> and optimal concentration of 3-MA and rapamycin. (Sup.1 A) CCK8 were performed to detect cell viability under different H<sub>2</sub>O<sub>2</sub> doses. The MGC were exposed to the H<sub>2</sub>O<sub>2</sub> at 0, 50, 100, 150, 200μM respectively for 24h, and found that exposure of MGC to 50μM did not lead to loss of cell viability. (Sup.1 B) the ROS generation in r-MC under normal condition or 50μM H<sub>2</sub>O<sub>2</sub> was detected by DHE kit via immunofluorescence. (Sup.1 C-E) The quantitative analysis of LC3 and SQSTM1/p62 were performed to detect optimal concentration of 3-MA. Data are shown as mean ± SEM. (n=3 per group, \*\**P*<0.01, \*\*\*\**P*<0.0001). The autophagic response which is determined by the change in expression of LC3 and SQSTM1/p62. Western blot analysis showed that 3-MA can significantly repress autophagy function at concentration of 1mM. (Sup.1 F-H) The quantitative analysis of LC3 and SQSTM1/p62 were performed to detect optimal concentration of rapamycin. Data are shown as mean ± SEM. (n=3 per group, \**P*<0.05) The autophagic response which is determined by the change in expression of LC3 and SQSTM1/p62. Western blot analysis showed that rapamycin can significantly enhance autophagy function at concentration of 2μM. (p62, SQSTM1/p62)

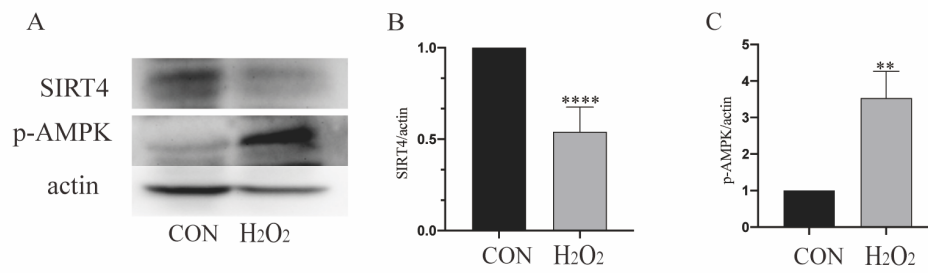

**FIGURE S2:** 50 $\mu$ M H<sub>2</sub>O<sub>2</sub> can inhibit SIRT4 and activate p-AMPK expression in Müller glial cells. (A) The expressional level of SIRT4 and p-AMPK with or without 50 $\mu$ M H<sub>2</sub>O<sub>2</sub> treatment in Müller glial cells. (B) SIRT4 is downregulated under 50 $\mu$ M H<sub>2</sub>O<sub>2</sub>. Data are shown as mean  $\pm$  SEM. (n=3 per group, \*\*\*\* $P$ <0.0001). (C) p-AMPK is activated under 50 $\mu$ M H<sub>2</sub>O<sub>2</sub>. Data are shown as mean  $\pm$  SEM. (n=3 per group, \*\* $P$ <0.01).

**FIGURE S3**

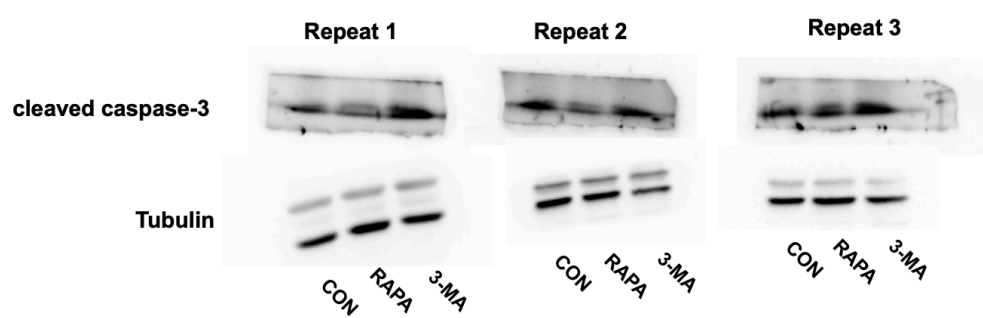

Original western images used for preparing FIGURE 1B

**FIGURE S4**

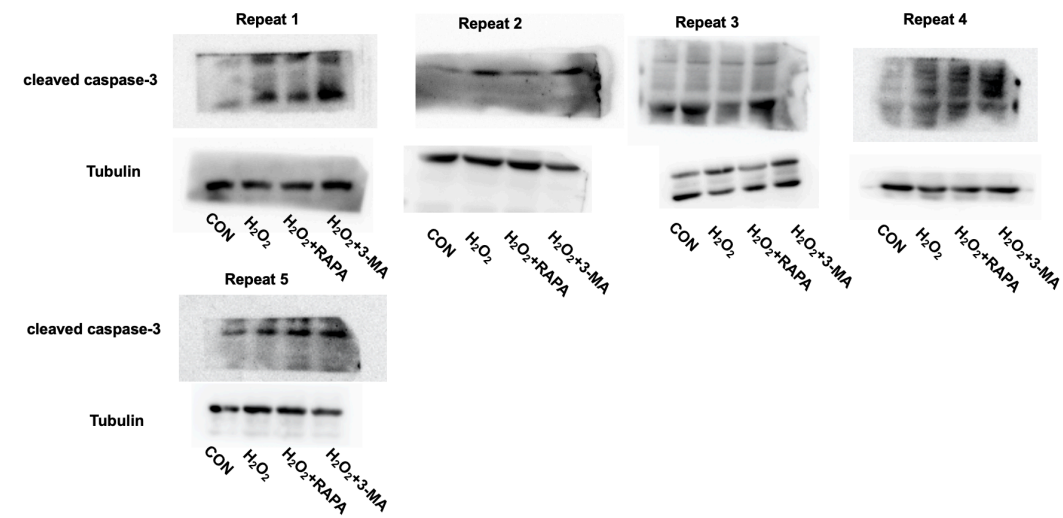

**Original western images used for preparing FIGURE 1C**

**FIGURE S5**

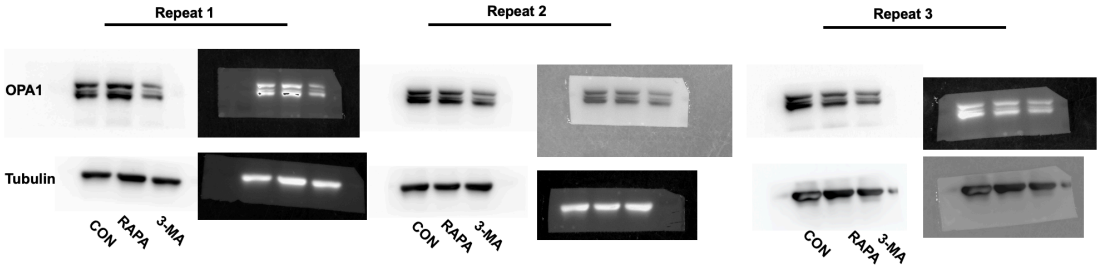

**Original western images used for preparing FIGURE 2E**

**FIGURE S6**

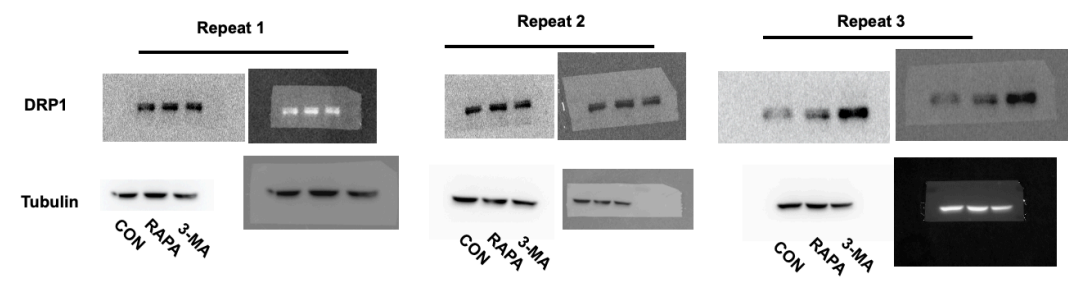

**Original western images used for preparing FIGURE 2F**

**FIGURE S7**

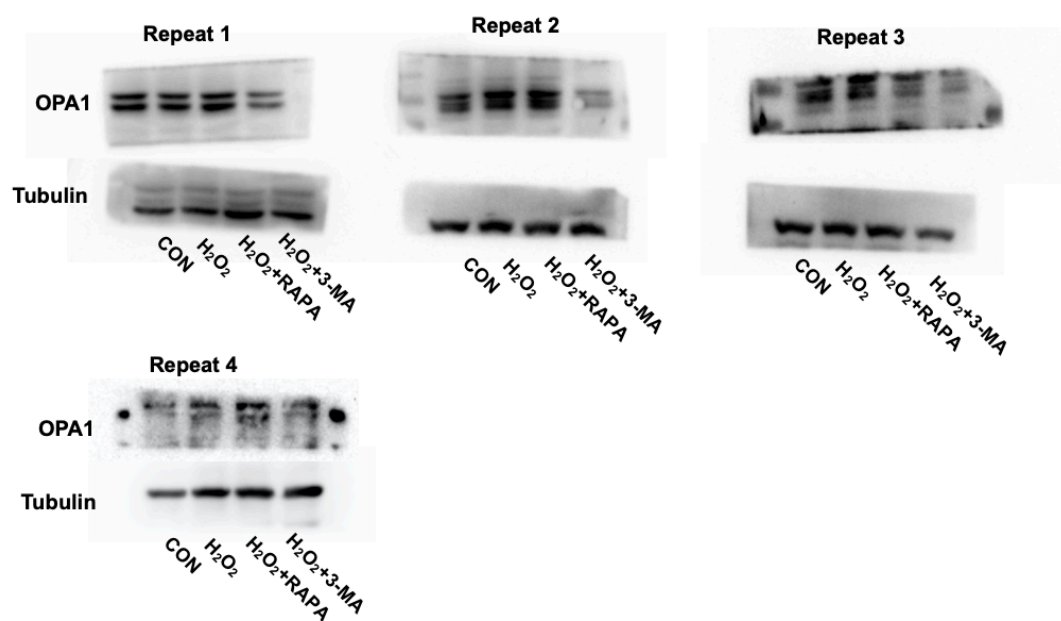

**Original western images used for preparing FIGURE 2G**



**FIGURE S8**

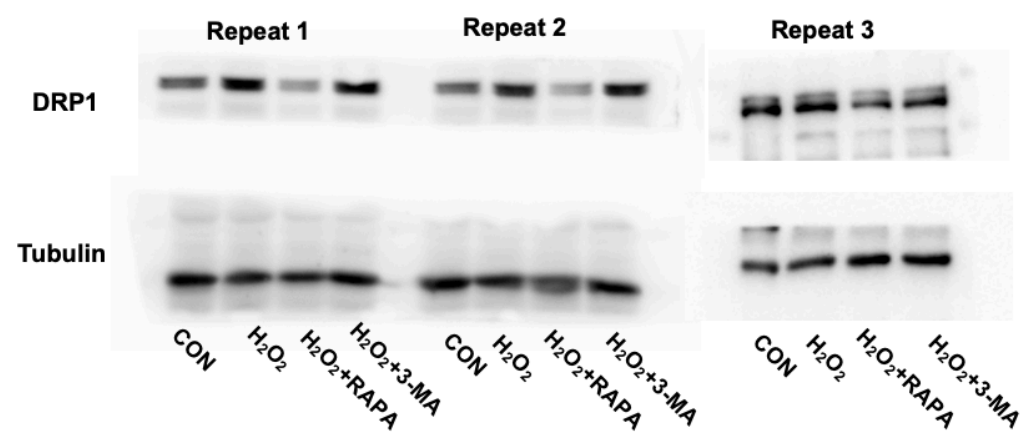

**Original western images used for preparing FIGURE 2H**

**FIGURE S9**

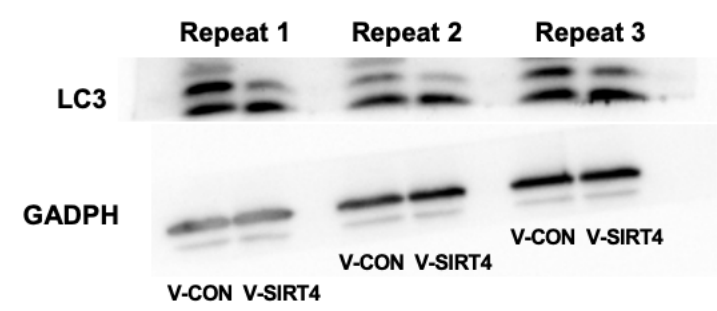

Original western images used for preparing Figure 6 H

**FIGURE S10**

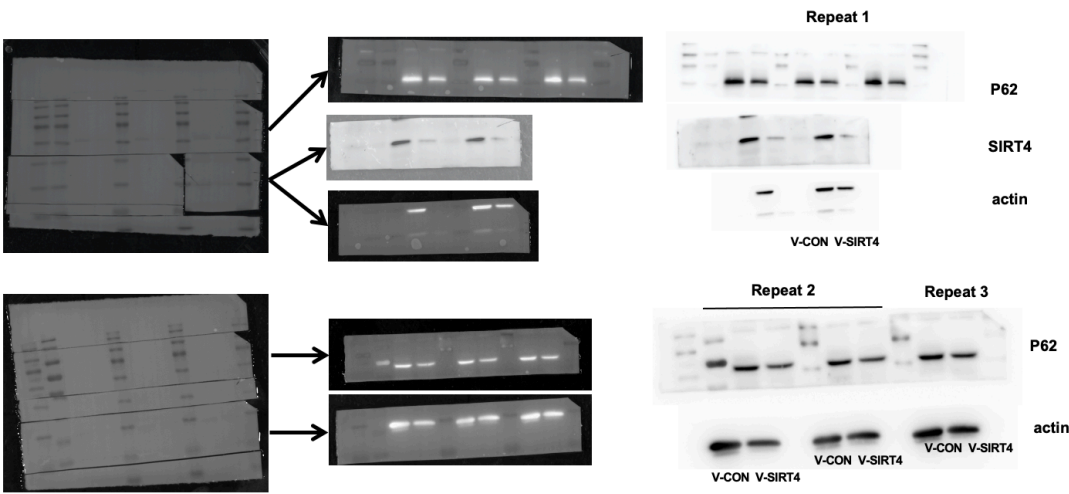

**Original western images used for preparing FIGURE 6 I**

**FIGURE S11**

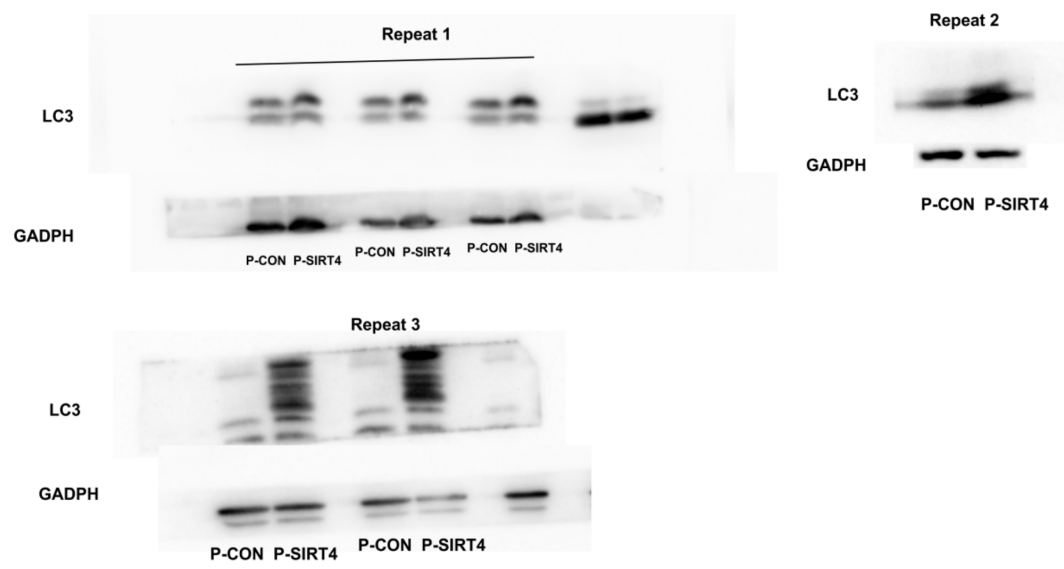

**Original western images used for preparing Figure 6E**

**FIGURE S12**

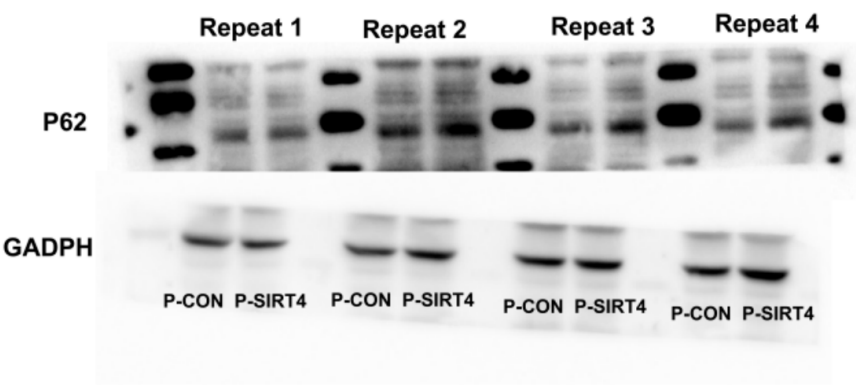

**Original western images used for preparing Figure 6F**

**FIGURE S13**

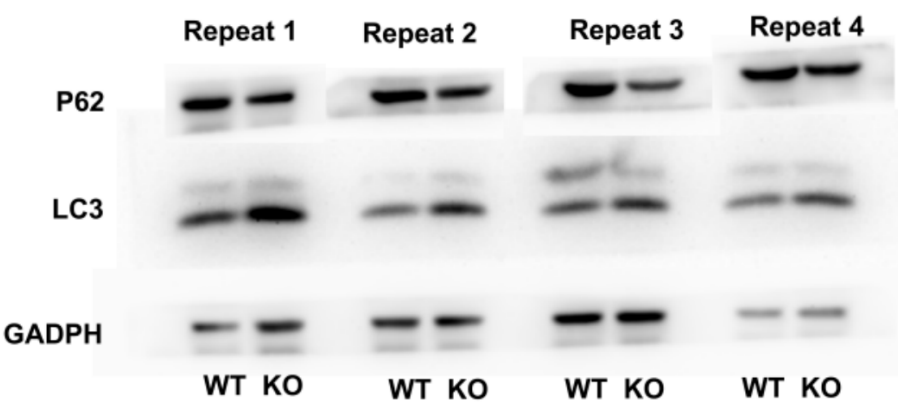

**Original western images used for preparing FIGURE 6 B - C**

**FIGURE S14**

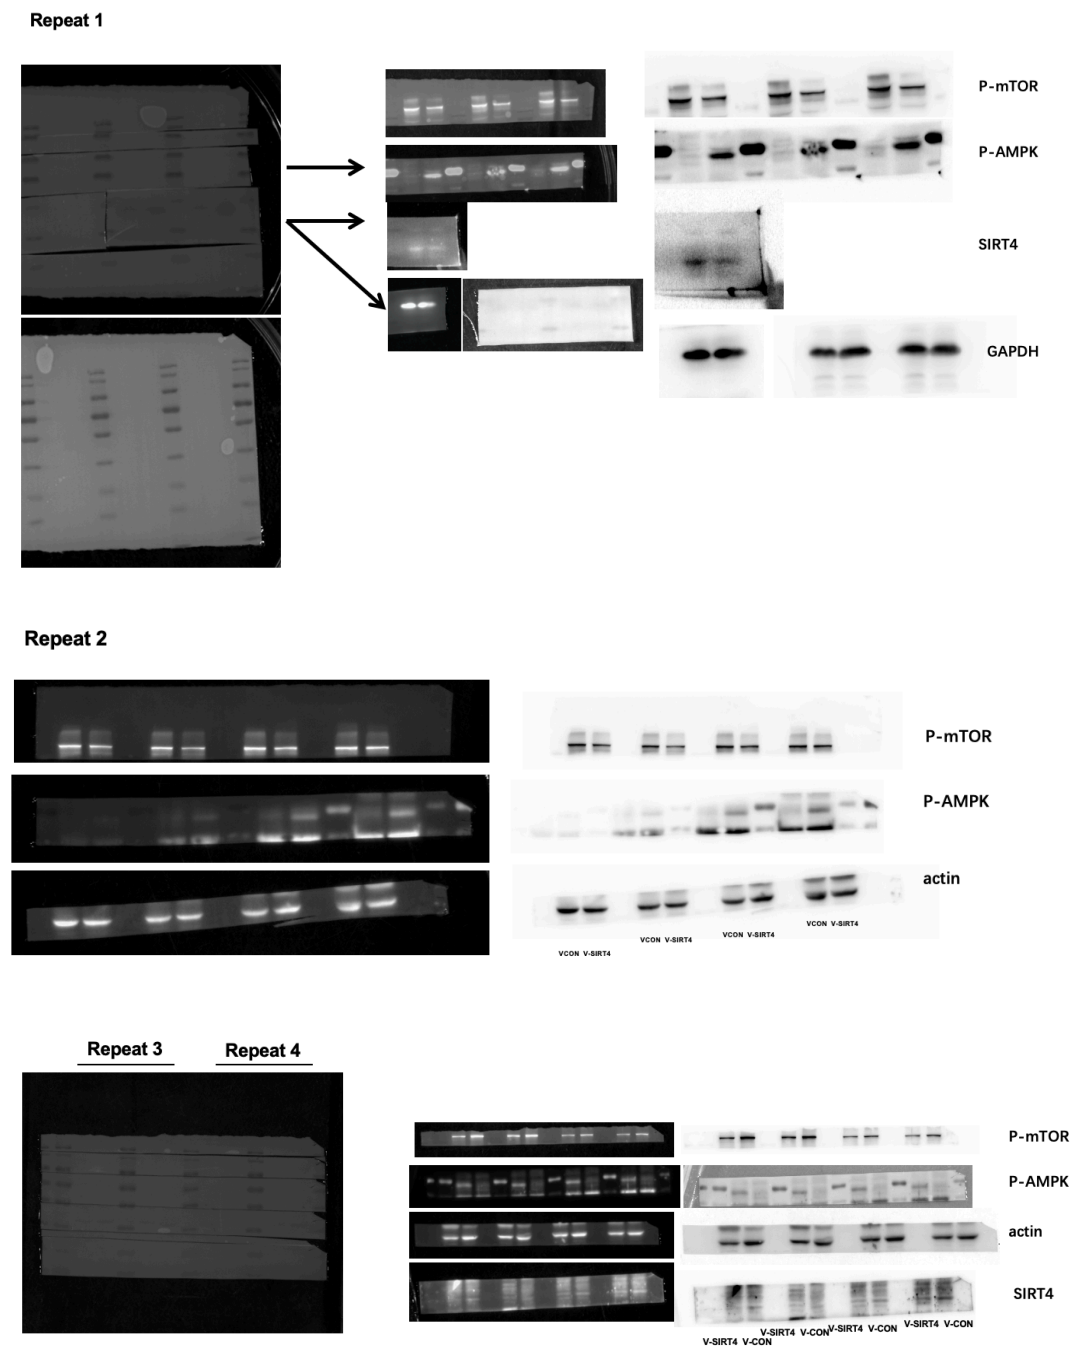

**Original western images used for preparing FIGURE 7A-B**

FIGURE S15

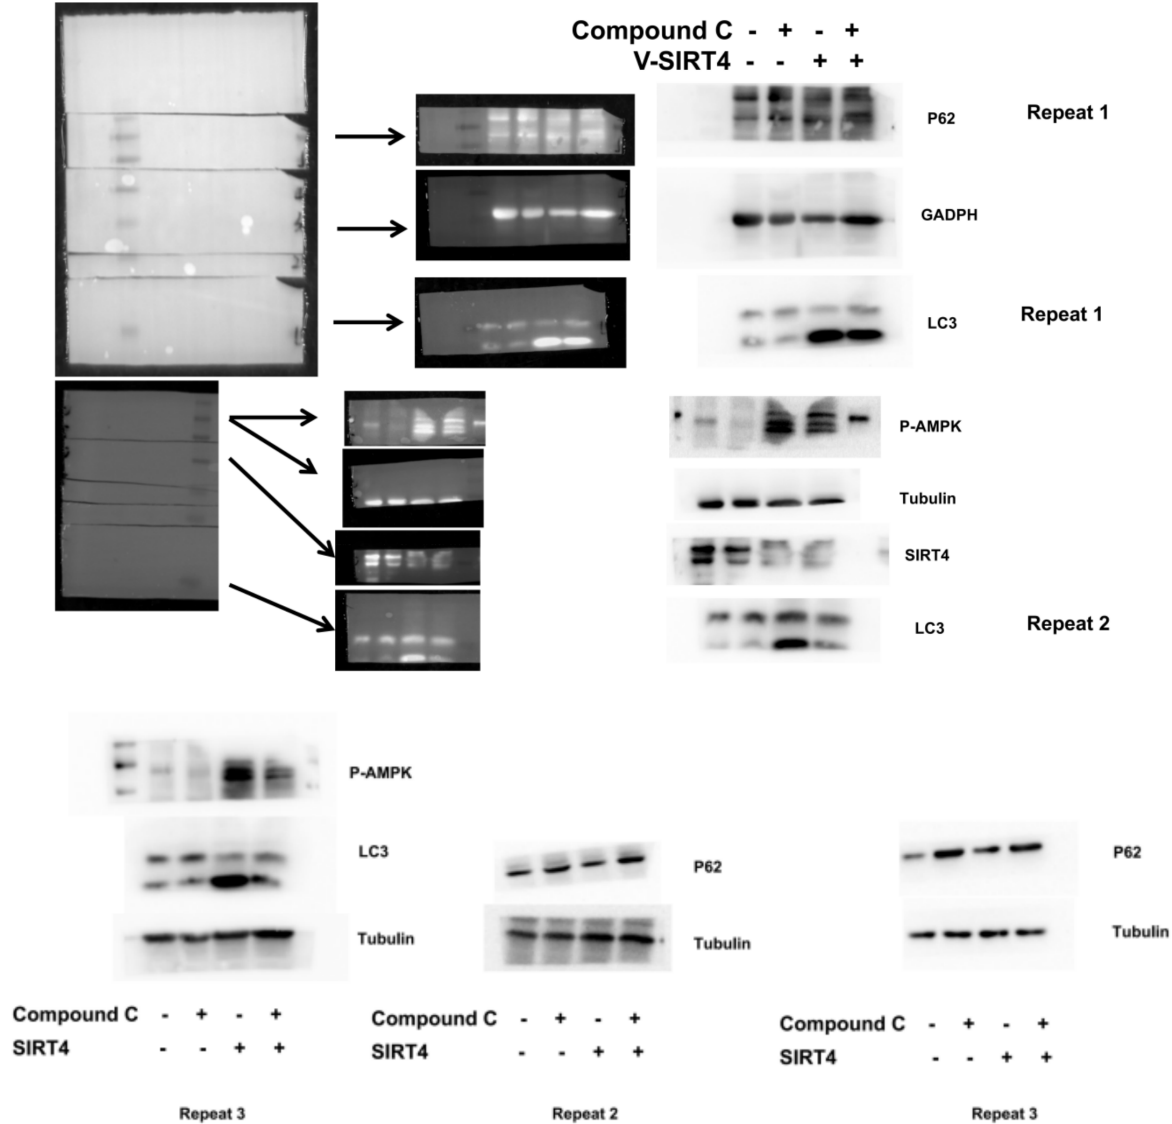

Original western images used for preparing Figure 7 D -F
